# Supplementary material
Source: Springer Nature journal article supplement (https://www.springermedizin.de/resource/supplementary/12913_2014_3551_MOESM1_ESM.pdf/9533156)

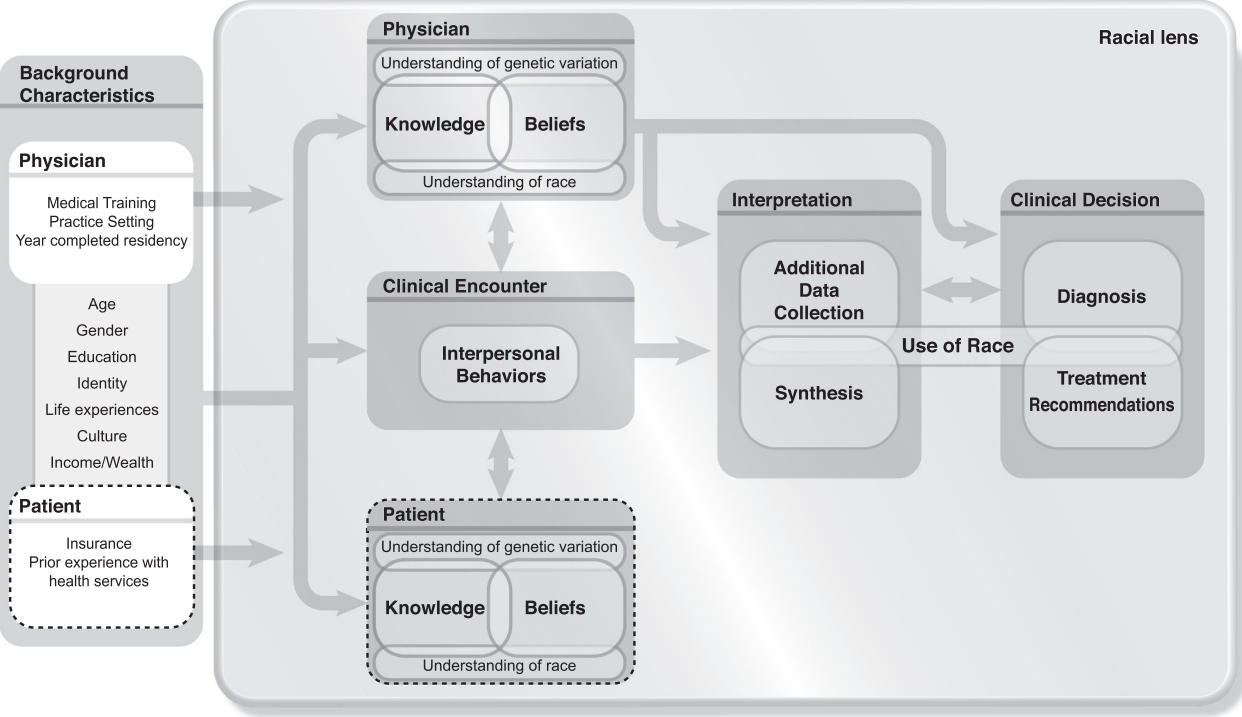

Supplement: MOESM1 [file 9533156]
